# Supplementary material
Source: PubMed Central journal article supplement (PMC5590673)
Supplement: NIHMS898004-supplement-Supplemental.pdf [file NIHMS898004-supplement-Supplemental.pdf]

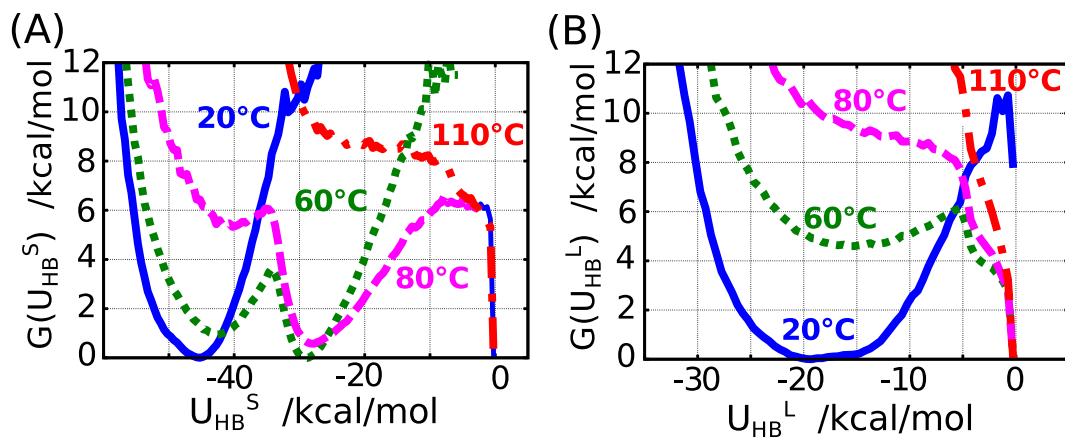

Figure S1: Free energy profiles of the hydrogen bond energy of two stems (A;  $U_{HB}^S$ ) and two loops (stem-loop interactions) (B;  $U_{HB}^L$ ) at  $C = 500$  mM and  $f = 0$ .

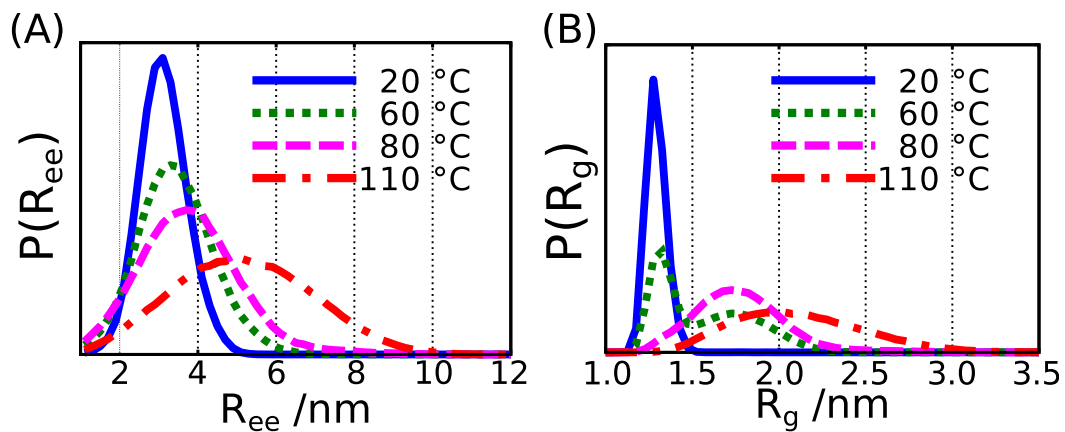

Figure S2: Probability distributions of the molecular extension (A;  $R_{ee}$ ) and radius of gyration (B;  $R_g$ ) at  $C = 500$  mM and  $f = 0$ .

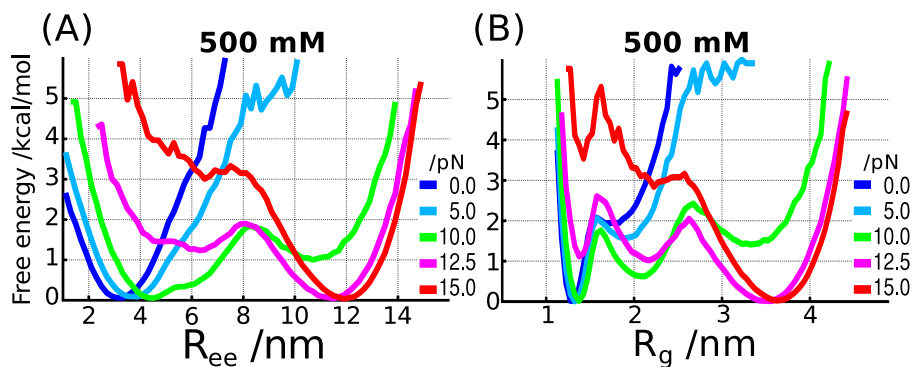

Figure S3: Free energy profiles as a function of  $R_{ee}$  (A) and  $R_g$  (B) at 500 mM of monovalent salt.

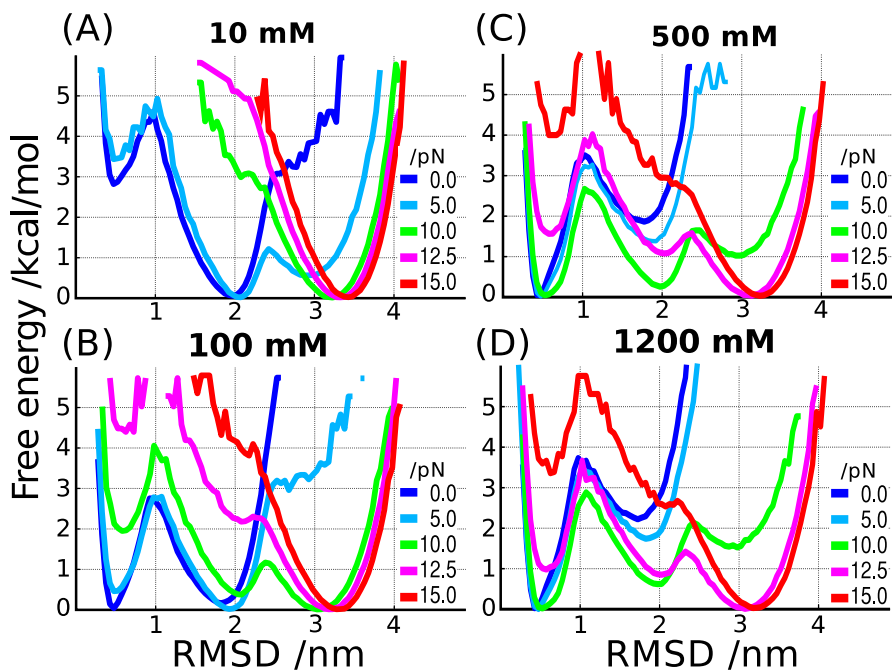

Figure S4: Free energy profiles as a function of RMSD at four different salt concentrations, 10 mM (A), 100 mM (B), 500 mM (C), and 1200 mM (D).

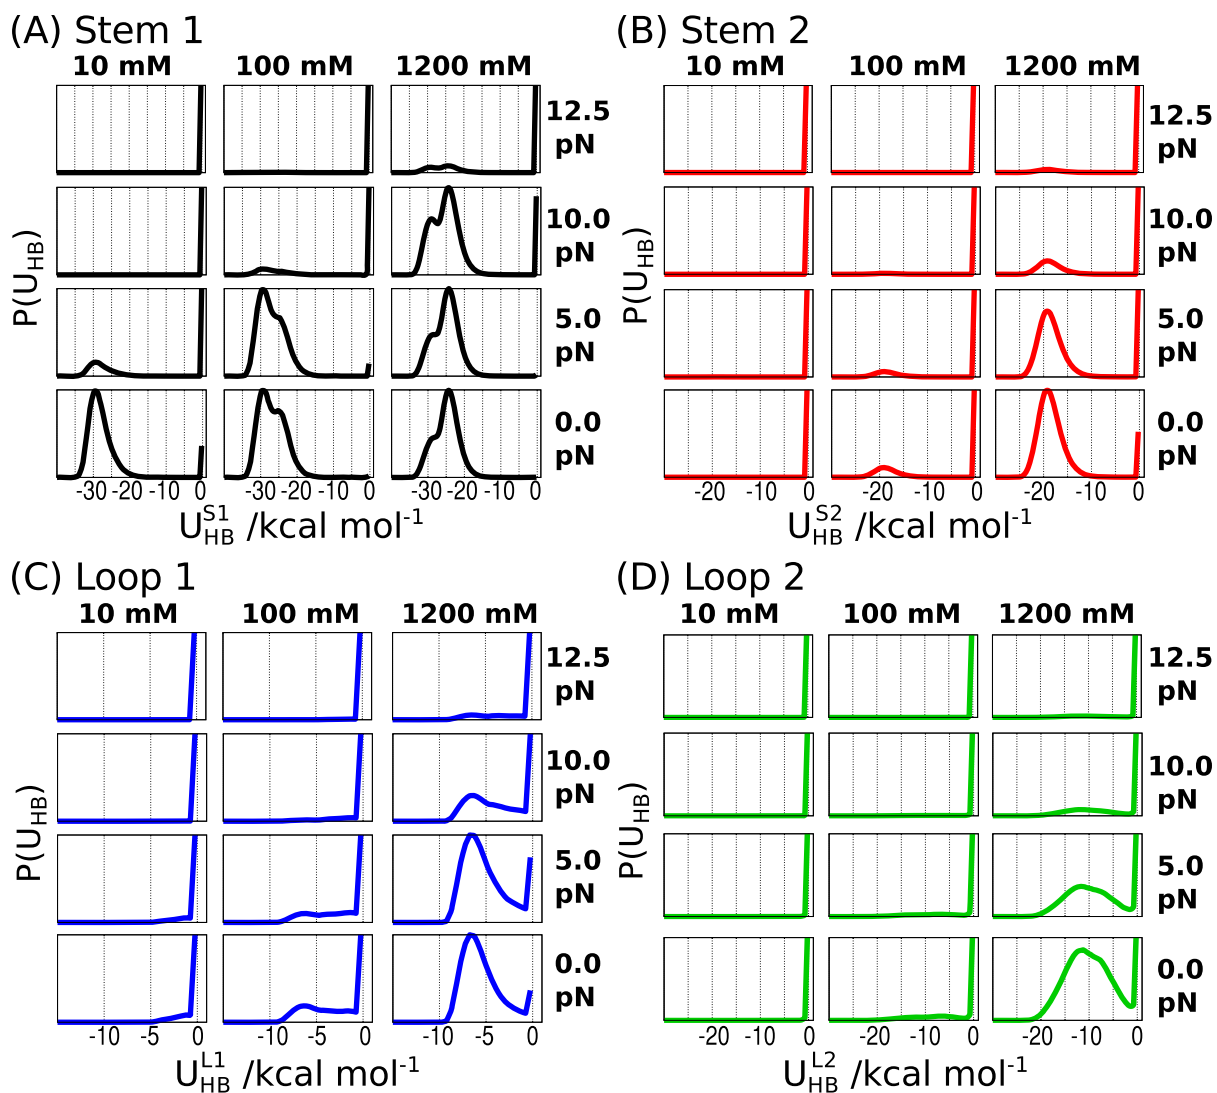

Figure S5: Probability distributions of hydrogen-bond energy. (A) Distribution of the total hydrogen bond energy. (B-E) Distributions of hydrogen bond energies for individual structural elements (B) Stem1; (C) Stem 2; (D) Loop 1 (E) Loop2. The salt concentrations and force values are explicitly indicated.

|    | Nucleotide pair | Interaction type (atoms) |
|----|-----------------|--------------------------|
| 1  | C3b - G18b      | canonical b.p.           |
| 2  | G4b - C17b      | canonical b.p.           |
| 3  | C5b - G16b      | canonical b.p.           |
| 4  | G6b - C15b      | canonical b.p.           |
| 5  | G7b - C14b      | canonical b.p.           |
| 6  | C10b - G28b     | canonical b.p.           |
| 7  | C11b - G27b     | canonical b.p.           |
| 8  | G12b - C26b     | canonical b.p.           |
| 9  | G4b - A20b      | N2 - N3                  |
| 10 | G4s - A20b      | O2' - N1                 |
| 11 | C5b - A20s      | O2 - O2'                 |
| 12 | G6s - A21p      | O2' - OP1                |
| 13 | G7b - A24b      | N2 - N1; N3 - N6         |
| 14 | C8b - G12b      | N4 - N7; N3 - O6         |
| 15 | C8b - A25b      | O2 - N6                  |
| 16 | C8b - C26b      | O2 - N4                  |
| 17 | C14s - A25b     | O2' - N1                 |
| 18 | C14b - A25b     | O2 - N6                  |
| 19 | C15s - A23b     | O2' - N1                 |
| 20 | C15b - A23b     | O2 - N6                  |
| 21 | G16b - A21p     | N2 - OP2                 |
| 22 | G16s - A21b     | O2' - N7                 |
| 23 | C17N - A20s     | O2 - O2'                 |

Table S1: List of hydrogen bonding interactions in BWYV PK. First 8 pairs correspond canonical base pairs forming stems S1 and S2. Other 15 pairs are all tertiary interactions forming either L1 or L2. Since we use the three-interaction-site model, a letter “s”, “b” or “p” is put following each nucleotide number to indicate one of sugar, base, or phosphate, respectively.
